# Supplementary material for: Global Proteomic Analysis Reveals High Light Intensity Adaptation Strategies and Polyhydroxyalkanoate Production in Rhodospirillum rubrum Cultivated With Acetate as Carbon Source
Source: Front Microbiol. 2020 Mar 25;11:464. doi: 10.3389/fmicb.2020.00464 (PMC7109303; doi:10.3389/fmicb.2020.00464)
Supplement: TABLE S1 — HeatMap related proteins presenting p-value < 0.05. [file Table_1.XLSX]

## Sheet: Feuil1
Rows	Accession number	Locus tag	Identified peptides	Description	Acetate competent strain post vs Acetate competent strain pre		WT strain acetic acid post vs WT strain acetic acid pre		WT strain succinic acid post vs WT strain succinic acid pre
					p-value	fold change	p-value	fold change	p-value	fold change
PRGe
4	Q2RQZ2	Rru_A2656	2	ATP12 ATPase	0.036	0.426	0.97399	1023	0.64862	1196
6	Q2RRP5	cbbM	5	Ribulose bisphosphate carboxylase	0.03871	0.509	0.41425	1236	0.30792	0.863
9	Q2RT16	Rru_A1929	3	Phosphoadenylylsulfate reductase (Thioredoxin)	0.00434	0.611	0.4871	1062	0.77174	0.968
11	Q2RN61	Rru_A3640	5	Non-canonical purine NTP pyrophosphatase	0.02239	0.556	0.26199	1232	0.34489	1084
13	Q2RR88	Rru_A2557	4	Uncharacterized protein	0.39791	0.936	0.02634	1516	0.11055	1155
14	Q2RN60	rph	2	Ribonuclease PH	0.95294	0.994	0.04444	1906	0.35269	1110
15	Q2RUQ4	Rru_A1340	5	Glycerone kinase	0.50999	1100	0.00389	1774	0.0975	1353
17	Q2RUN2	Rru_A1362	4	Xylose isomerase-like TIM barrel	0.46291	0.777	0.0137	2403	0.72549	0.951
33	Q2RMS4	trmB	3	tRNA (guanine-N(7)-)-methyltransferase	0.71707	0.949	0.04768	1599	0.85269	1024
37	Q2RVW5	Rru_A0929	3	Uncharacterized protein	0.00342	0.560	0.76447	0.944	0.52093	0.842
41	Q2RYB1	Rru_A0079	3	Transcriptional regulator. CarD family	0.00099	0.520	0.55571	0.913	0.00096	0.372
42	Q2RV23	Rru_A1221	3	Uncharacterized protein	0.56633	0.819	0.90369	0.952	0.00652	0.461
PRGd
190	Q2RN48	Rru_A3653	2	Uncharacterized protein	0.0025	1809	0.16064	0.704	0.21067	1291
192	Q2RNP9	Rru_A3452	3	TonB-dependent receptor	0.05866	1570	0.01578	4304	0.04452	3979
197	Q2RRJ5	Rru_A2450	2	Peptidase M48. Ste24p	0.02803	1582	0.06432	1533	0.05523	1484
200	Q2RY52	Rru_A0138	4	Leucine aminopeptidase 2. chloroplastic	0.00041	1730	0.04831	1690	0.85263	1029
201	Q2RT64	Rru_A1881	5	Pyruvate dehydrogenase E1 component subunit alpha	0.00071	1742	0.0122	2017	0.01036	1418
202	Q2RS62	Rru_A2233	4	Transcriptional regulatory protein	0.00149	2080	0.10302	1211	0.01554	1336
203	Q2RWT2	Rru_A0609	4	UspA	0.00365	1625	0.91265	1018	0.35309	1159
204	Q2RV43	Rru_A1201	4	MaoC-like dehydratase	0.00051	1764	0.30914	0.827	0.98208	0.996
205	Q2RW00	Rru_A0894	5	Stress protein	0.00049	1726	0.02069	1168	0.20642	1213
207	Q2RPS4	Rru_A3076	5	ATP:cob(I)alamin adenosyltransferase	0.0003	1719	0.00471	1949	0.01338	1379
208	Q2RQZ1	Rru_A2657	5	AsmA	0.00625	1539	0.51611	1084	0.00114	1449
219	Q2RTZ0	Rru_A1605	4	Alpha amylase. catalytic region	0.46827	1093	0.04595	1531	0.00597	1650
220	Q2RN79	Rru_A3622	3	Uncharacterized protein	0.24759	1202	0.08354	1707	0.03057	2629
221	Q2RQQ7	Rru_A2741	5	Polysaccharide biosynthesis protein CapD	0.00784	1547	0.19505	1373	0.01111	1352
222	Q2RUY0	Rru_A1264	4	Short-chain dehydrogenase/reductase SDR	0.00437	1772	0.25406	1354	0.1342	1395
223	Q2RP20	Rru_A3331	5	Cytochrome C oxidase. mono-heme subunit/FixO	0.05608	1348	0.8951	0.978	0.00377	1607
229	Q2RWG8	Rru_A0723	3	Amine oxidase	0.00771	3360	0.07816	0.568	0.0528	1608
231	Q2RR43	gmhA	3	Phosphoheptose isomerase	0.16792	1335	0.70039	1204	0.03743	2030
232	Q2RP19	Rru_A3332	2	Cytochrome c oxidase cbb3-type. subunit I	0.19816	1545	0.09315	0.412	0.00015	2252
234	Q2RXG9	Rru_A0371	4	Double-transmembrane region-like	0.03165	1666	0.40222	0.956	0.0022	1261
237	Q2RP68	Rru_A3282	5	Uncharacterized protein	0.0071	1738	0.41376	1104	0.11456	1187
238	Q2RN50	Rru_A3651	5	ABC transporter component	0.01935	1619	0.29245	0.849	0.26766	1153
240	Q2RN36	Rru_A3665	3	Chemotaxis sensory transducer	0.01242	2320	0.33446	1244	0.36601	1104
241	Q2RXX3	Rru_A0217	5	Citrate lyase	0.00341	1927	0.14303	1266	0.12159	1118
246	Q2RPR7	Rru_A3083	5	NADPH-dependent FMN reductase	0.08552	1298	0.03889	2010	0.017	1754
251	Q2RXK8	Rru_A0332	5	Glutathione S-transferase-like	0.00062	1738	0.01642	2012	0.00345	1420
252	Q2RVT3	Rru_A0961	3	Uncharacterized protein	0.00757	1646	0.07035	1867	0.14404	1162
255	Q2RMW6	Rru_A3735	2	Uncharacterized protein	0.03832	1503	0.20362	1465	0.11756	1299
257	Q2RMU9	Rru_A3752	3	Uncharacterized protein	0.00491	2570	0.3763	1780	0.21962	1366
259	Q2RQQ8	Rru_A2740	4	UDP-N-acetylglucosamine 2-epimerase	0.00029	1584	0.1609	1381	0.03013	1327
260	Q2RSQ4	Rru_A2041	5	Aminotransferase	0.11325	1199	0.00244	1714	0.00242	1485
261	Q2RRD6	Rru_A2509	5	Fructose-bisphosphate aldolase	0.0186	1529	0.01352	2050	0.88599	1471
262	Q2RVI7	Rru_A1057	5	3-hydroxybutyrate dehydrogenase	0.0021	1508	0.00604	1968	0.00071	1630
263	Q2RXF5	Rru_A0385	5	Gamma-glutamyltransferase 1. Threonine peptidase. MEROPS family T03	0.00089	1608	0.06275	1694	0.00872	1391
264	Q2RNT0	Rru_A3421	5	Uncharacterized protein	0.00048	1716	0.01191	1923	0.02099	1516
265	Q2RN06	Rru_A3695	4	Acetoacetyl-CoA synthase	0.00584	1518	0.23529	1191	0.00295	1766
268	Q2RSX3	Rru_A1972	5	Phosphoenolpyruvate-protein phosphotransferase	0.04735	1723	0.12601	1535	0.01758	1432
PRGc
280	Q2RRG2	Rru_A2483	5	5'-Nucleotidase	0.6908	1030	0.05332	1609	0.03633	1316
282	Q2RP46	Rru_A3304	4	ABC transporter component	0.01527	1505	0.02966	1799	0.0265	1442
283	Q2RTZ1	glgE	2	Alpha-1.4-glucan:maltose-1-phosphate maltosyltransferase	0.9895	0.997	0.39191	1728	0.00278	1855
284	Q2RS35	Rru_A2260	3	Uncharacterized protein	0.04247	1372	0.12228	1886	0.00676	1906
288	Q2RN51	Rru_A3650	5	Lipolytic enzyme. G-D-S-L	0.02223	1410	0.02446	1725	0.63161	1085
291	Q2RXQ2	Rru_A0288	5	2.5-didehydrogluconate reductase	0.497	1150	0.01542	1626	0.00194	1315
292	Q2RS56	Rru_A2239	5	TRAP dicarboxylate transporter-DctP subunit	0.97032	0.996	0.02298	1505	0.01537	1340
293	Q2RTM1	Rru_A1724	5	ThiJ/PfpI	0.89161	1019	0.00368	1911	0.00168	1648
296	Q2RWW1	Rru_A0580	4	OsmC-like protein	0.19071	1374	0.00904	2400	0.10306	1404
298	Q2RUP1	Rru_A1353	4	Uncharacterized protein	0.49239	1193	0.00132	3811	0.79723	1038
299	Q2RNN2	Rru_A3469	2	Uncharacterized protein	0.54784	1172	0.0183	3402	0.65059	1081
300	Q2RNN5	rocD	4	Ornithine aminotransferase	0.49302	1196	0.01607	3911	0.31113	1106
301	Q2RX78	Rru_A0462	5	Aldehyde dehydrogenase	0.04422	1622	0.00214	3251	0.00345	1330
302	Q2RYH0	Rru_A0020	4	Glutathione peroxidase	0.63415	1078	0.00094	2834	0.05436	1654
308	Q2RQF1	dksA	2	RNA polymerase-binding transcription factor DksA	0.34351	1160	0.58149	1172	0.00201	1502
311	Q2RU47	Rru_A1548	3	Malonyl-CoA decarboxylase	0.33054	1167	0.29239	1183	0.02251	1666
317	Q2RXB4	Rru_A0426	4	Uncharacterized protein	0.21552	0.513	0.02318	4229	0.80873	0.950
318	Q2RQM3	Rru_A2775	5	Dienelactone hydrolase	0.13402	1309	0.03558	2858	0.0001	2004
319	Q2RN20	Rru_A3681	5	YceI	0.13719	1336	0.06034	2342	0.01019	1691
320	Q2RMV7	Rru_A3744	2	Predicted signal-transduction protein containing CBS domains	0.27279	0.612	0.17017	2766	0.04887	2189
322	Q2RS87	Rru_A2208	4	Uncharacterized protein	0.49254	0.864	0.04805	9818	0.00585	2168
323	Q2RUE8	Rru_A1446	4	Uncharacterized protein	0.89617	0.969	0.02278	7358	0.01065	1643
324	Q2RY98	Rru_A0092	5	Extracellular solute-binding protein. family 1	0.93214	0.981	0.04187	3145	0.12894	1231
327	Q2RVH4	Rru_A1070	2	Heat shock protein Hsp20	0.48994	0.760	0.00485	1920	0.1574	2285
329	Q2RN34	Rru_A3667	2	Short-chain dehydrogenase/reductase SDR	0.45481	1229	0.0184	1841	0.00289	1482
331	Q2RSR9	Rru_A2026	4	Ferredoxin	0.13391	0.736	0.01812	1688	0.27791	1243
333	Q2RTT1	Rru_A1664	3	Conserved hypothetical cytosolic protein	0.03164	0.861	0.05595	1395	0.70789	0.976
337	Q2RWC2	Rru_A0769	5	Extracellular solute-binding protein. family 1	0.03898	3282	0.0228	5011	0.30509	1317
338	Q2RT67	Rru_A1878	5	Dihydrolipoyl dehydrogenase	0.07458	1350	0.00146	1941	0.01495	1422
339	Q2RNU6	Rru_A3405	4	Formaldehyde dehydrogenase (Glutathione)	0.02883	1587	0.01313	2288	0.02845	1604
341	Q2RTZ4	gltX2	4	Glutamate--tRNA ligase 2	0.1537	1171	0.00103	1824	0.00221	1483
342	Q2RRZ3	Rru_A2302	5	Periplasmic binding protein/LacI transcriptional regulator	0.13764	1209	0.0043	3016	0.0004	1963
343	Q2RN38	Rru_A3663	4	Glutamate dehydrogenase (NAD)	0.09676	1160	0.0066	1957	0.00886	1306
344	Q2RNV1	Rru_A3400	5	Thiosulphate-binding protein	0.73074	0.952	0.01257	1729	0.01326	1242
345	Q2RY95	Rru_A0095	5	ABC transporter component	0.69521	0.938	0.00161	2509	0.46756	1108
349	Q2RTD1	Rru_A1814	4	Carbon monoxide dehydrogenase subunit G	0.01499	1820	0.02879	1613	0.01204	1441
350	Q2RU63	Rru_A1532	4	TPR repeat	0.03734	1371	0.01089	1514	0.0125	1463
351	Q2RNM7	Rru_A3474	4	Bacterioferritin	0.06004	1468	0.0004	1758	0.00912	1431
352	Q2RU58	Rru_A1537	3	Uncharacterized protein	0.13346	1823	0.00986	2376	0.02384	2058
353	Q2RMK4	Rru_B0045	5	Phosphomannomutase	0.03216	1252	0.01056	1869	0.00076	1450
362	Q2RT33	Rru_A1912	3	Short-chain dehydrogenase/reductase SDR	0.0613	1305	0.20546	1401	0.01396	1538
366	Q2RRD5	Rru_A2510	2	Uncharacterized protein	0.19893	1220	0.28535	1150	0.02183	1826
367	Q2RSA1	Rru_A2194	2	MaoC-like dehydratase	0.00315	2359	0.01905	3899	0.17868	1812
368	Q2RWP8	Rru_A0643	4	Uncharacterized protein	0.02091	1290	0.00651	1879	0.0016	1387
369	Q2RNJ5	Rru_A3506	4	Putative branched-chain amino acid transport system substrate-binding protein	0.01925	1733	0.003	2412	0.00013	1359
370	Q2RRH9	Rru_A2466	5	Glyoxalase/bleomycin resistance protein/dioxygenase	0.02411	1419	0.02017	1981	0.13814	1216
371	Q2RPC2	Rru_A3228	3	Cyclase/dehydrase	0.05053	1742	0.01137	2041	0.11326	1775
372	Q2RQB1	greA	4	Transcription elongation factor GreA	0.00263	1616	0.04294	2260	0.03695	1313
373	Q2RWI7	Rru_A0704	5	Molybdenum ABC transporter. periplasmic binding protein	0.00368	1800	0.02789	1953	0.17152	1180
374	Q2RTA4	Rru_A1841	4	Flavin reductase-like. FMN-binding	0.00012	1803	0.10045	1782	0.00203	1821
376	Q2RNI3	Rru_A3518	2	2-dehydropantoate 2-reductase	0.01887	3408	0.29207	2322	0.63048	1102
383	Q2RRM8	Rru_A2417	5	Lipoprotein YaeC	0.45055	1098	0.01084	1691	0.88259	0.976
385	Q2RUQ8	Rru_A1336	2	Periplasmic binding protein/LacI transcriptional regulator	0.84063	1067	0.03703	2426	0.24505	1133
386	Q2RSM7	mgsA	2	Methylglyoxal synthase	0.87789	1012	0.00065	1721	0.76663	1031
387	Q2RQX7	rpsE	5	30S ribosomal protein S5	0.18988	1302	0.03238	1667	0.96817	1004
389	Q2RVK4	Rru_A1040	2	Leucine dehydrogenase	0.01376	2430	0.01115	3139	0.15537	1158
390	Q2RQV1	rplJ	5	50S ribosomal protein L10	0.19265	1181	0.02958	1752	0.69612	0.966
394	Q2RQL7	Rru_A2781	5	UPF0261 protein Rru_A2781	0.01099	1282	0.01133	1511	0.58773	1251
399	Q2RN23	Rru_A3678	5	TRAP dicarboxylate transporter-DctP subunit	0.00025	2061	0.00286	2536	0.43782	1108
400	Q2RRI0	Rru_A2465	5	Pyruvate kinase	0.00012	1340	0.00412	1555	0.16177	1135
401	Q2RMZ0	Rru_A3711	4	Thioredoxin-related	0.01006	1322	0.02795	1602	0.01994	1260
402	Q2RT65	Rru_A1880	5	Pyruvate dehydrogenase beta subunit	0.00118	1451	0.00133	2093	0.00418	1516
403	Q2RT66	Rru_A1879	5	Acetyltransferase component of pyruvate dehydrogenase complex	0.00017	1689	0.02696	2590	0.00243	1480
407	Q2RTJ9	Rru_A1746	5	Extracellular ligand-binding receptor	0.45682	1100	0.0122	2075	0.32537	1100
408	Q2RPH5	gatB	5	Aspartyl/glutamyl-tRNA(Asn/Gln) amidotransferase subunit B	0.61325	1046	0.00388	1505	0.20191	1119
410	Q2RX66	Rru_A0474	5	Zinc-containing alcohol dehydrogenase superfamily	0.0305	1317	0.01699	1305	0.0027	1600
411	Q2RU91	Rru_A1503	4	Zinc-containing alcohol dehydrogenase superfamily	0.21166	1539	0.09942	1566	0.00456	1713
412	Q2RX64	Rru_A0476	3	OsmC-like protein	0.68144	1029	0.08859	4645	0.00614	4299
413	Q2RTZ5	Rru_A1600	5	Citrate synthase	0.02621	1236	0.00415	1867	0.00706	1485
414	Q2RSM4	Rru_A2071	5	Methylmalonate-semialdehyde dehydrogenase (Acylating)	0.01343	1433	0.00444	1913	0.01146	1652
415	Q2RXS2	Rru_A0268	5	Molybdopterin binding domain	0.24001	1116	0.00926	1575	0.00482	1179
417	Q2RST1	Rru_A2014	5	Twin-arginine translocation pathway signal	0.16809	1209	0.01662	1720	0.06305	1270
420	Q2RRZ7	Rru_A2298	4	Uncharacterized protein	0.02448	1699	0.04759	1606	0.0042	1695
422	Q2RXF1	Rru_A0389	4	Antibiotic biosynthesis monooxygenase	0.13719	0.698	0.16252	1557	0.0305	1563
423	Q2RSK2	Rru_A2093	2	Methyltransferase FkbM	0.82648	0.869	0.2132	1501	0.01075	1624
429	Q2RXH1	Rru_A0369	5	ATPase associated with various cellular activities. AAA_3	0.21857	1255	0.29548	1319	0.04286	1522
433	Q2RNC6	acsA	5	Acetyl-coenzyme A synthetase	0.0039	2015	0.00028	1994	0.10242	1262
434	Q2RQK1	Rru_A2797	4	Uncharacterized protein	0.00582	2149	0.01626	3408	0.63869	1051
435	Q2RUG2	Rru_A1432	5	Nicotinate-nucleotide pyrophosphorylase (Carboxylating)	0.05732	1282	0.01387	2026	0.9192	1008
436	Q2RWX8	Rru_A0563	5	Twin-arginine translocation pathway signal	0.51889	1107	0.00412	2354	0.16834	1146
440	Q2RT28	Rru_A1917	5	Extracellular solute-binding protein. family 5	0.49709	1078	0.02154	1674	0.06691	1280
441	Q2RRT3	msrA	4	Peptide methionine sulfoxide reductase MsrA	0.34297	1147	0.01923	2817	0.00395	1770
443	Q2RUU0	hutU	2	Urocanate hydratase	0.0598	1375	0.12376	2310	0.00175	1596
444	Q2RNT4	Rru_A3417	5	Extracellular ligand-binding receptor	0.70985	1077	0.12183	2114	0.02186	1935
445	Q2RX76	Rru_A0464	5	Uncharacterized protein	0.07484	1399	0.40582	1323	0.00264	1626
448	Q2RSP8	Rru_A2047	5	Extracellular solute-binding protein. family 1	0.06996	1357	0.01794	2024	0.13831	1276
449	Q2RN18	Rru_A3683	5	YceI	0.24242	1323	0.03841	2119	0.03097	1415
451	Q2RVT6	rsmH	4	Ribosomal RNA small subunit methyltransferase H	0.04806	1673	0.36798	1814	0.31576	1276
453	Q2RXG1	Rru_A0379	4	Flavodoxin	0.77047	1077	0.02148	2692	0.1382	1580
454	Q2RTQ4	s E	2	Polyamine aminopropyl transferase	0.52415	1086	0.01177	1619	0.04346	1288
455	Q2RX65	Rru_A0475	5	NADH:flavin oxidoreductase/NADH oxidase	0.00165	1718	0.03759	1986	0.08304	1489
456	Q2RXC3	acpP	4	Acyl carrier protein	0.79782	0.952	0.0352	1862	0.72938	1057
457	Q2RSK8	Rru_A2087	5	Extracellular solute-binding protein. family 3	0.49749	0.899	0.01307	1722	0.34976	1102
PRGb
458	Q2RT91	pdxJ	5	Pyridoxine 5'-phosphate synthase	0.05307	0.804	0.00188	0.521	0.4739	0.955
459	Q2RWM0	Rru_A0671	5	Cobalamin synthesis CobW protein	0.02519	0.764	0.00233	0.475	0.26642	0.925
460	Q2RRC0	Rru_A2525	3	Peptidase U32	0.03084	0.765	0.01181	0.229	0.05338	0.776
461	Q2RWS5	Rru_A0616	5	Photosynthetic complex assembly protein	0.42155	0.854	0.01101	0.086	0.00378	0.499
463	Q2RT78	Rru_A1867	4	Uncharacterized protein	0.11232	1202	0.00026	0.305	0.00481	0.721
464	Q2RQC4	Rru_A2874	5	FAD dependent oxidoreductase	0.53385	0.932	0.00606	0.571	0.47045	1044
465	Q2RYD1	ispH	5	4-hydroxy-3-methylbut-2-enyl diphosphate reductase	0.53998	0.921	0.15325	0.302	0.70498	0.950
466	Q2RSI6	Rru_A2109	4	ATP-dependent Clp protease ATP-binding subunit ClpA	0.05079	1186	0.02299	0.343	0.04946	0.887
469	Q2RNV5	Rru_A3396	3	Acyl-homoserine-lactone synthase	0.23163	0.657	0.0089	0.274	0.00619	0.437
470	Q2RWE4	ispG	4	4-hydroxy-3-methylbut-2-en-1-yl diphosphate synthase	0.01669	0.542	0.00248	0.314	0.0025	0.499
471	Q2RNI8	Rru_A3513	3	Chemotaxis sensory transducer	0.06984	0.532	0.04984	0.125	0.01847	0.469
472	Q2RU03	dxr	2	1-deoxy-D-xylulose 5-phosphate reductoisomerase	0.06166	0.573	0.05212	0.379	0.00081	0.411
474	Q2RPD5	Rru_A3215	4	Uncharacterized protein	0.12637	0.690	0.01052	0.155	0.03052	0.549
475	Q2RWS6	Rru_A0615	4	Photosynthetic complex assembly protein	0.78745	0.962	0.01743	0.236	0.07089	0.781
476	Q2RQ19	Rru_A2981	5	2-desacetyl-2-hydroxyethyl bacteriochlorophyllide	0.45614	0.919	0.04329	0.369	0.01162	0.775
477	Q2RWX5	Rru_A0566	5	Uncharacterized protein	0.21648	0.783	0.06558	0.164	0.0037	0.651
478	Q2RX20	Rru_A0521	5	CheA Signal Transduction Histidine Kinases (STHK)	0.40422	0.912	0.04506	0.542	0.04173	0.711
479	Q2RVV0	ftsZ	5	Cell division protein FtsZ	0.11824	1188	0.00041	0.284	0.00042	0.436
480	Q2RU66	Rru_A1529	5	Transcriptional regulator. ArsR family	0.63772	0.934	0.00088	0.276	0.00035	0.374
484	Q2RWS2	Rru_A0619	5	Magnesium protoporphyrin O-methyltransferase	0.00116	0.565	0.00674	0.083	0.00059557	0.216
485	Q2RWR7	Rru_A0624	2	2-vinyl bacteriochlorophyllide hydratase	0.06832	0.473	0.01637	0.032	0.0002	0.218
486	Q2RWR9	bchB	5	Light-independent protochlorophyllide reductase subunit B	0.00951	0.672	0.025138	0.153	0.00027	0.483
487	Q2RSW7	Rru_A1978	5	Indolepyruvate oxidoreductase subunit IorA	0.00386	0.462	0.00629	0.094	0.00011	0.445
488	Q2RWS1	bchL	5	Light-independent protochlorophyllide reductase iron-sulfur ATP-binding protein	0.00582	0.501	0.00049	0.065	0.00031	0.205
489	Q2RQ20	Rru_A2980	4	Chlorophyllide reductase iron protein subunit X	0.00017	0.351	0.00714	0.022	0.00077	0.058
490	Q2RQ22	Rru_A2978	4	Chlorophyllide reductase subunit Z	0.00107	0.436	0.04608	0.054	0.00059	0.074
491	Q2RRD7	Rru_A2508	4	5-aminolevulinate synthase	0.00064	0.432	0.00397	0.032	0.00066	0.064
492	Q2RQ17	Rru_A2983	4	Farnesyl-diphosphate synthase	0.00018	0.514	0.0026	0.048	0.00025	0.034
493	Q2RQ21	Rru_A2979	4	Chlorophyllide reductase subunit Y	0.00466	0.590	0.00048	0.159	0.00025	0.129
494	Q2RRA9	Rru_A2536	5	Uncharacterized protein	0.02068	0.711	0.00286	0.071	0.00012	0.367
496	Q2RQ23	Rru_A2977	2	Light-harvesting protein B-870 beta chain	0.1899	0.618	0.01463	0.358	0.01434	0.239
497	Q2RRJ3	Rru_A2452	4	Uncharacterized protein	0.4714	0.880	0.00219	0.302	0.0067971	0.323
498	Q2RWV8	Rru_A0583	2	Glycosyl transferase. group 1	0.22655	0.809	0.00382	0.228	0.0064	0.356
499	Q2RU64	Rru_A1531	4	Methionine synthase (B12-dependent)	0.00033	0.464	0.00266	0.116	0.0016	0.251
500	Q2RPA9	Rru_A3241	4	Chemotaxis sensory transducer	0.02026	0.463	0.0087	0.222	0.00031	0.236
501	Q2RVF8	Rru_A1086	4	Probable transcriptional regulatory protein Rru_A1086	0.18827	0.859	0.00045	0.447	0.02145	0.796
502	Q2RNF3	Rru_A3548	5	Magnesium-protoporphyrin IX monomethyl ester anaerobic oxidative cyclase	0.17838	0.824	0.01129	0.434	0.02637	0.707
503	Q2RT14	Rru_A1931	4	Ferredoxin--nitrite reductase	0.19209	0.775	0.03323	0.234	0.08159	0.663
505	Q2RRE1	Rru_A2504	5	Coproporphyrinogen-III oxidase	0.18861	0.865	0.02198	0.478	0.00552	0.754
507	Q2RU65	Rru_A1530	4	Methylenetetrahydrofolate reductase	0.11623	0.772	0.04456	0.311	0.02072	0.689
508	Q2RSW8	Rru_A1977	3	Pyruvate ferredoxin/flavodoxin oxidoreductase	0.02913	0.619	0.10122	0.115	0.03514	0.605
509	Q2RXD6	Rru_A0404	4	Amidophosphoribosyltransferase	0.62504	0.651	0.01119	0.543	0.4762	0.906
510	Q2RT15	Rru_A1930	4	Uncharacterized conserved protein UCP030820	0.00044	0.404	0.0004	0.295	0.26553	0.826
511	Q2RQD3	Rru_A2865	3	Peptidase M24	0.15555	0.479	0.00283	0.371	0.16955	0.821
515	Q2RY70	Rru_A0120	3	Chemotaxis sensory transducer	0.25048	1264	0.04788	0.266	0.00063	0.382
516	Q2RX47	Rru_A0493	4	Phytoene desaturase	0.86155	0.983	0.0163	0.600	0.02006	0.679
517	Q2RP06	Rru_A3345	5	Putative diguanylate cyclase/phosphodiesterase (GGDEF & EAL domains) with PAS/PAC sensor(S)	0.0599	1373	0.00636	0.304	0.03258	0.680
519	Q2RRN4	Rru_A2411	5	Aminotransferase	0.53592	1082	0.02808	0.578	0.04945	0.799
520	Q2RT79	Rru_A1866	4	Lytic transglycosylase. catalytic	0.28161	0.883	0.00545	0.286	0.03923	0.591
521	Q2RXN8	Rru_A0302	2	Hydrogenase accessory protein HypB	0.44388	1118	0.00042	0.239	0.13271	0.778
522	Q2RNF7	Rru_A3544	3	Phosphate-specific transport system accessory protein PhoU	0.17929	1240	0.00294	0.535	0.05225	0.753
525	Q2RXR9	folE	4	GTP cyclohydrolase 1	0.74003	1027	0.00341	0.530	0.87772	0.988
526	Q2RPA3	Rru_A3247	3	Uncharacterized protein	0.44822	0.849	0.00713	0.250	0.90319	0.987
527	Q2RV13	Rru_A1231	5	Uncharacterized protein	0.59649	0.891	0.0492	0.591	0.49185	0.942
529	Q2RND9	Rru_A3562	5	Uncharacterized protein	0.21325	0.871	0.00857	0.408	0.12035	0.884
530	Q2RTH8	Rru_A1767	2	Peptidase M23B	0.05039	0.802	0.0076	0.103	0.02521	0.820
531	Q2RR75	Rru_A2573	3	Iron-regulated ABC transporter membrane component SufB	0.00809	0.746	0.02198	0.561	0.03434	0.736
532	Q2RU50	Rru_A1545	5	Putative diguanylate cyclase (GGDEF domain)	0.09452	0.771	0.0032	0.561	0.84576	0.977
533	Q2RWX2	Rru_A0569	4	Chorismate mutase	0.16124	0.779	0.01858	0.502	0.22075	0.925
534	Q2RU13	Rru_A1582	4	DNA polymerase III. alpha subunit	0.1058	0.699	0.01481	0.504	0.18147	0.798
535	Q2RRP0	Rru_A2405	4	Transketolase	0.1679	0.652	0.01552	0.279	0.16193	0.898
536	Q2RVE4	glmM	5	Phosphoglucosamine mutase	0.17036	0.812	0.0002	0.338	0.23986	0.846
537	Q2RT13	Rru_A1932	4	Uncharacterized protein	0.01339	0.523	0.44264	0.694	0.33772	0.810
538	Q2RMQ7	Rru_A3794	5	Cysteine synthase	0.15714	0.844	0.03654	0.652	0.15044	1230
539	Q2RNC2	htpX	5	Protease HtpX homolog	0.27556	1188	0.0134	0.368	0.13119	1509
540	Q2RNB3	Rru_A3588	4	Cytochrome B561	0.43258	1255	0.02164	0.356	0.06563	1628
541	Q2RVQ1	Rru_A0993	3	Transcriptional regulator. NifA. Fis family	0.64173	0.927	0.14725	0.391	0.01152	2009
542	Q2RSR5	Rru_A2030	5	Uncharacterized protein	0.92164	1011	0.00056	0.394	0.18963	1179
545	Q2RRM3	Rru_A2422	3	Uncharacterized protein	0.18719	1218	0.02577	0.536	0.22861	1137
551	Q2RWJ5	Rru_A0696	3	RNA methyltransferase TrmH. group 1	0.0105	0.616	0.0542	0.385	0.1517	0.780
553	Q2RRE7	Rru_A2498	4	ABC transporter component	0.38641	1041	0.01731	0.628	0.73124	0.976
554	Q2RSW9	Rru_A1976	5	Phenylacetate-coenzyme A ligase	0.00994	0.620	0.00482	0.176	0.00176	0.478
555	Q2RRC1	Rru_A2524	5	Peptidase U32	0.01077	0.711	0.00163	0.236	0.00515	0.550
556	Q2RWK8	Rru_A0683	5	3-deoxy-D-arabinoheptulosonate-7-phosphate synthase	0.00075	0.642	0.00077	0.440	0.00104	0.637
557	Q2RWR8	bchN	5	Light-independent protochlorophyllide reductase subunit N	0.03047	0.762	0.027511	0.096	0.04966	0.564
558	Q2RU34	Rru_A1561	5	NADH-quinone oxidoreductase. chain G	0.01421	0.796	0.00833	0.619	0.53977	0.964
559	Q2RQ18	Rru_A2982	3	Hydroxyneurosporene-O-methyltransferase	0.06652	0.826	0.00478	0.418	0.48625	0.895
560	Q2RVD7	Rru_A1107	3	Uncharacterized protein	0.01715	0.699	0.00919	0.395	0.42052	0.901
561	Q2RXR4	Rru_A0276	5	Polyhydroxyalkanoate synthesis repressor PhaR	0.47385	0.947	0.01299	0.436	0.49704	0.932
563	Q2RWS0	Rru_A0621	5	Hydrogenobyrinic acid a.c-diamide cobaltochelatase	0.03393	0.402	0.0821	0.106	0.0036	0.214
564	Q2RX46	Rru_A0494	3	Phytoene synthase	0.30362	0.759	0.00039	0.193	0.86646	0.176
565	Q2RRP2	fbp	5	Fructose-1.6-bisphosphatase class 1	0.01406	0.503	0.00885	0.376	0.02643	0.477
567	Q2RP25	Rru_A3326	3	4Fe-4S ferredoxin. iron-sulfur binding	0.14466	0.589	0.01281	0.401	0.0422	0.577
570	Q2RXA3	Rru_A0437	5	OmpA family protein	0.15123	0.655	0.00369	0.427	0.02509	0.649
571	Q2RYC8	Rru_A0062	3	Terpene synthase. squalene cyclase	0.28441	0.474	0.00111	0.084	0.72488	0.239
573	Q2RVR5	Rru_A0979	2	Extracellular solute-binding protein. family 5	0.42265	0.729	0.03508	0.408	0.15223	0.607
579	Q2RPV0	gcvH	3	Glycine cleavage system H protein	0.02173	0.541	0.84651	1072	0.44521	1151
582	Q2RS97	Rru_A2198	2	Uncharacterized protein	0.02053	0.659	0.08122	0.470	0.30743	0.858
583	Q2RYI1	Rru_A0009	4	PTS IIA-like nitrogen-regulatory protein PtsN	0.04303	0.637	0.03654	0.507	0.01425	0.594
584	Q2RWU3	Rru_A0598	2	Phosphate ABC transporter. periplasmic binding protein	0.67088	0.876	0.01087	0.346	0.0298	0.756
585	Q2RS28	Rru_A2267	4	Electron transfer flavoprotein beta-subunit	0.07339	0.553	0.00086	0.067	0.00049	0.321
587	Q53046	nifJ	2	Pyruvate-flavodoxin oxidoreductase	0.03605	0.783	0.01965	0.040	0.00275	0.318
589	Q2RNN9	Rru_A3462	3	Cold-shock DNA-binding protein family	0.3128	0.881	0.01185	0.398	0.55811	0.960
590	Q2RXA4	Rru_A0436	4	Uncharacterized protein	0.16418	0.653	0.03725	0.227	0.02293	0.558
591	Q2RRB1	Rru_A2534	5	Flagellin-like	0.1891	0.700	0.02329	0.162	0.00077	0.460
593	Q2RVP9	Rru_A0995	3	4Fe-4S ferredoxin. iron-sulfur binding	0.02622	0.417	0.09953	0.282	0.17628	1672
596	Q2RQ26	Rru_A2974	5	Photosynthetic reaction centre M subunit	0.63765	0.923	0.08477	0.332	0.04142	0.596
PRGa
606	Q2RU74	Rru_A1521	2	Cold-shock DNA-binding protein family	0.00015	0.214	0.0286	0.333	0.95214	0.978
607	Q2RST9	Rru_A2006	4	L-carnitine dehydratase/bile acid-inducible protein F	0.00406	0.372	0.05651	0.244	0.85343	0.971
611	Q2RPW2	Rru_A3038	2	Uncharacterized protein	0.00738	1752	0.28609	0.830	0.11838	0.669
612	Q2RPC4	Rru_A3226	3	Enoyl-[acyl-carrier-protein] reductase [NADH]	0.00087	2160	0.0384	0.656	0.83653	0.964
614	Q2RST0	Rru_A2015	5	Chaperone DnaJ	0.0349	1482	0.24877	0.779	0.00344	2449
616	Q2RSI4	Rru_A2111	5	Uncharacterized protein	0.57562	1229	0.00167	0.095	0.00913	0.411
617	Q2RPT7	Rru_A3063	5	Crotonyl-CoA carboxylase/reductase	0.1422	1792	0.13806	0.637	0.03048	1929
618	Q2RUH6	Rru_A1418	5	Alkyl hydroperoxide reductase/ Thiol specific antioxidant/ Mal allergen	0.10228	1516	0.00137	0.564	0.82719	0.987
622	Q2RPN4	Rru_A3116	5	Uncharacterized protein	0.67764	0.939	0.0226	0.580	0.60767	0.890
624	Q2RPX0	glmU	5	Bifunctional protein GlmU	0.28568	1381	0.02087	0.615	0.53486	0.905
626	Q2RY29	groS	5	10 kDa chaperonin	0.37841	1134	0.00071	0.190	0.51908	0.921
627	Q2RPP5	Rru_A3105	2	Glycosyl transferases group 1	0.20621	1356	0.03446	0.524	0.23599	0.819
628	Q2RMR1	Rru_A3790	5	Glycolate reductase	0.0282	1292	0.01255	0.608	0.95884	0.994
630	Q2RT18	Rru_A1927	4	Acetyl-CoA hydrolase	0.0023	0.675	0.0026585	0.148	0.82089	0.969
631	Q2RUR9	Rru_A1325	4	Uncharacterized protein	0.7672	0.927	0.0404	0.046	0.26218	0.826
632	Q2RUS0	Rru_A1324	5	Beta subunit of malonate decarboxylase	0.31259	0.791	0.00744	0.066	0.00823	0.593
633	Q2RX73	Rru_A0467	5	Acetolactate synthase. large subunit	0.07267	1122	0.0261	0.586	0.15251	1281
634	Q2RVS0	Rru_A0974	5	Linocin_M18 bacteriocin protein	0.00959	1299	0.03088	0.551	0.0285	1293
635	Q2RSC4	Rru_A2171	4	Extracellular ligand-binding receptor	0.10993	0.611	0.03668	0.413	0.06876	1385
638	Q2RTU1	Rru_A1654	3	Response regulator receiver domain protein (CheY)	0.49916	1184	0.00499	0.364	0.85868	0.977
639	Q2RMS8	Rru_A3773	5	CBS domain protein	0.57376	0.937	0.00391	0.605	0.31769	0.985
